# Supplementary material
Source: PubMed Central journal article supplement (PMC3795109)
Supplement: SD2.pdf [file SD2.pdf]

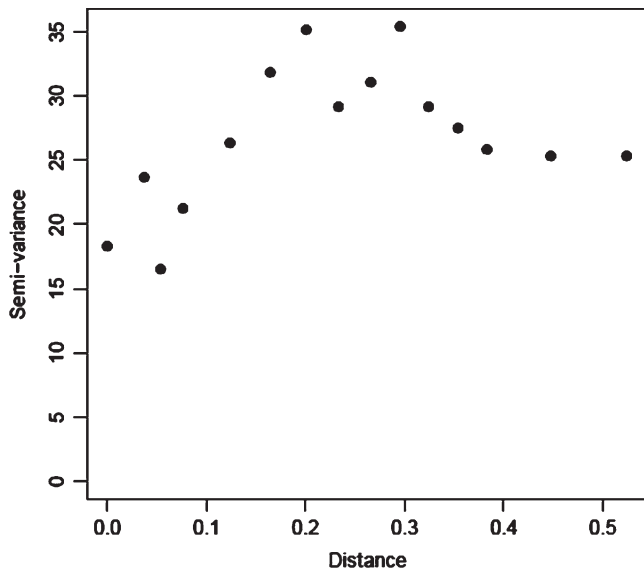

SUPPLEMENTAL FIGURE 1. Containers  $\geq 40$  L-Y = container positive for larvae, X = positive neighbor container in 0-10 m radius interval; 0-10 m—without spatial random effects correction.

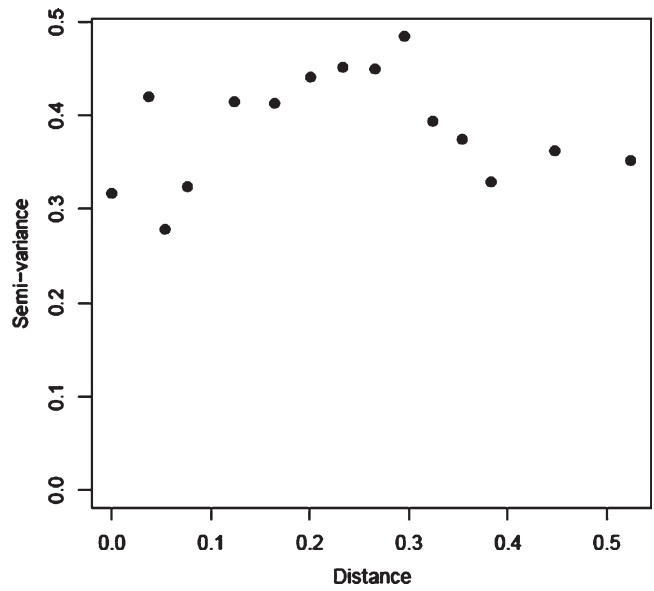

SUPPLEMENTAL FIGURE 2. The 0-10 m—with spatial random effects correction—note the greater consistency in semi-variance across distances.

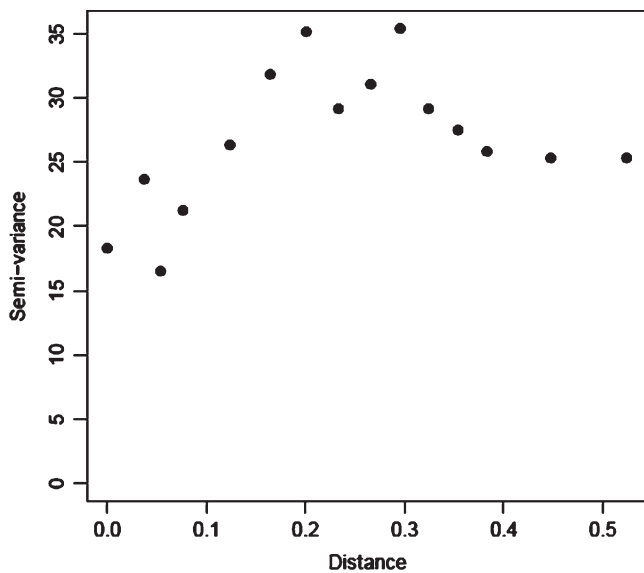

SUPPLEMENTAL FIGURE 3. Containers  $< 40$  L-Y = Container positive for larvae, X = Positive neighbor container in 0-10 m radius interval. The -10 m—without spatial random effects correction.

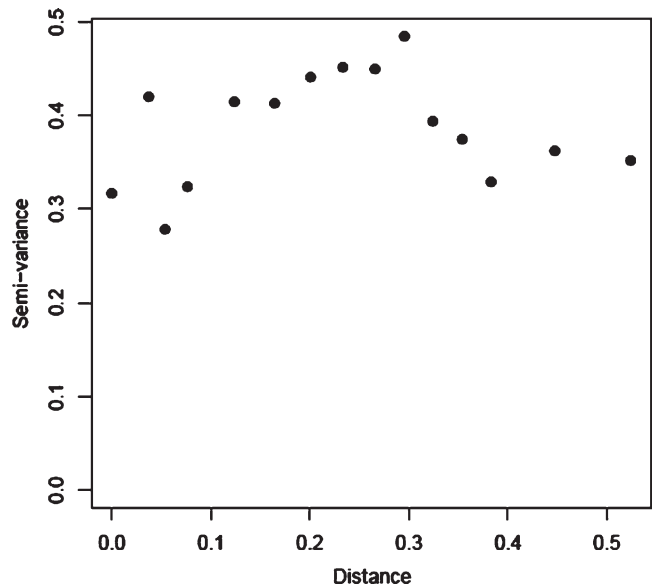

SUPPLEMENTAL FIGURE 4. The 0-10 m—with spatial random effects correction—note the greater consistency in semi-variance across distances.

SUPPLEMENTAL TABLE 4A

Greater than 40 L—this table includes all of the covariates in the Table 4 models concerning the association between positive containers  $\geq$  40 L in neighboring households and the odds of a target container being positive for *Aedes aegypti* juveniles\*

| Covariate                                  | 0–10 m             | 10–20 m            | 20–30 m            | 30–40 m            |
|--------------------------------------------|--------------------|--------------------|--------------------|--------------------|
| Pos. neighbor container in radius interval | 8.59 (2.60, 28.35) | 5.73 (1.54, 21.26) | 0.72 (0.18, 2.93)  | 3.40 (1.47, 7.85)  |
| Temephos                                   | 0.27 (0.05, 1.36)  | 0.26 (0.05, 1.40)  | 0.25 (0.05, 1.38)  | 0.23 (0.04, 1.29)  |
| Chlorine                                   | 2.75 (1.00, 7.60)  | 3.58 (1.27, 10.09) | 4.09 (1.40, 11.97) | 3.76 (1.35, 10.53) |
| Container topped/capped                    | 0.73 (0.28, 1.87)  | 0.79 (0.30, 2.08)  | 0.75 (0.28, 1.98)  | 0.67 (0.25, 1.79)  |
| No. of persons living in the house         | 1.01 (0.84, 1.22)  | 1.05 (0.86, 1.29)  | 1.03 (0.83, 1.27)  | 0.99 (0.81, 1.20)  |
| Container rainwater-fed                    | 2.61 (1.00, 6.83)  | 2.68 (1.00, 7.18)  | 3.27 (1.19, 9.03)  | 3.24 (1.20, 8.74)  |
| Container indoors                          | 0.63 (0.24, 1.67)  | 0.64 (0.24, 1.71)  | 0.74 (0.28, 2.01)  | 0.81 (0.31, 2.12)  |
| Container $\geq$ 40 L                      | 5.38 (2.40, 12.07) | 5.48 (2.42, 12.42) | 5.75 (2.51, 13.17) | 5.45 (2.42, 12.26) |
| No. of containers in household             | 0.97 (0.89, 1.05)  | 0.97 (0.89, 1.06)  | 0.97 (0.89, 1.06)  | 0.98 (0.91, 1.06)  |

\*Bolded and italicized values are statistically significant at the  $\alpha = 0.05$  level.

SUPPLEMENTAL TABLE 4B

Less than 40 L—this table includes all of the covariates in the Table 4 models concerning the association between positive containers  $>$  40 L in neighboring households and the odds of a target container being positive for *Aedes aegypti* juveniles\*

| Covariate                                  | 0–10 m                    | 10–20 m                   | 20–30 m                   |
|--------------------------------------------|---------------------------|---------------------------|---------------------------|
| Pos. neighbor container in radius interval | <b>3.37 (1.57, 7.26)</b>  | 1.55 (0.72, 3.37)         | 1.28 (0.38, 4.35)         |
| Temephos                                   | 0.28 (0.05, 1.47)         | 0.27 (0.05, 1.48)         | 0.25 (0.04, 1.36)         |
| Chlorine                                   | <b>3.40 (1.21, 9.59)</b>  | <b>3.81 (1.31, 11.14)</b> | <b>3.93 (1.35, 11.47)</b> |
| Container topped/capped                    | 0.72 (0.27, 1.88)         | 0.70 (0.26, 1.89)         | 0.72 (0.27, 1.94)         |
| No. of persons living in the house         | 1.02 (0.84, 1.25)         | 1.02 (0.83, 1.26)         | 1.02 (0.83, 1.25)         |
| Container rainwater-fed                    | <b>2.93 (1.10, 7.82)</b>  | <b>3.04 (1.10, 8.41)</b>  | <b>3.20 (1.16, 8.78)</b>  |
| Container indoors                          | 0.71 (0.27, 1.90)         | 0.71 (0.26, 1.94)         | 0.74 (0.27, 1.99)         |
| Container $\geq$ 40 L                      | <b>5.64 (2.49, 12.77)</b> | <b>5.48 (2.39, 12.53)</b> | <b>5.64 (2.46, 12.90)</b> |
| Number of containers in household          | 0.98 (0.90, 1.06)         | 0.98 (0.90, 1.07)         | 0.98 (0.90, 1.07)         |

\*Bolded and italicized values are statistically significant at the  $\alpha = 0.05$  level.

SUPPLEMENTAL TABLE 5A

Greater than 40 L—this table includes all of the covariates in the Table 5 models concerning the association between positive containers  $\geq$  40 L in neighboring households and the odds of a target container being positive for *Aedes aegypti* pupae\*

| Covariate                                  | 0–10 m                    | 10–20 m                   | 20–30 m                   | 30–40 m                   |
|--------------------------------------------|---------------------------|---------------------------|---------------------------|---------------------------|
| Pos. neighbor container in radius interval | <b>5.00 (1.90, 13.16)</b> | <b>3.46 (1.17, 10.19)</b> | 0.61 (0.11, 3.57)         | 2.00 (0.74, 5.38)         |
| Temephos                                   | 0.15 (0.02, 1.38)         | 0.16 (0.01, 1.77)         | 0.17 (0.01, 2.25)         | 0.16 (0.01, 2.19)         |
| Chlorine                                   | 2.15 (0.80, 5.79)         | 2.54 (0.90, 7.19)         | 3.07 (0.96, 9.84)         | 3.02 (0.95, 9.58)         |
| Container topped/capped                    | 0.50 (0.17, 1.49)         | 0.56 (0.17, 1.77)         | 0.55 (0.16, 1.94)         | 0.52 (0.15, 1.84)         |
| No. of persons living in the house         | 0.90 (0.75, 1.08)         | 0.93 (0.76, 1.14)         | 0.90 (0.72, 1.13)         | 0.88 (0.70, 1.10)         |
| Container rainwater-fed                    | 1.07 (0.34, 3.34)         | 0.95 (0.27, 3.30)         | 1.34 (0.35, 5.13)         | 1.29 (0.34, 4.91)         |
| Container indoors                          | 0.79 (0.29, 2.18)         | 0.78 (0.27, 2.32)         | 0.95 (0.29, 3.11)         | 0.94 (0.29, 3.02)         |
| Container $\geq$ 40 L                      | <b>5.73 (2.22, 14.78)</b> | <b>5.78 (2.10, 15.90)</b> | <b>5.83 (1.99, 17.15)</b> | <b>5.49 (1.87, 16.08)</b> |
| No. of containers in household             | 0.97 (0.90, 1.05)         | 0.97 (0.89, 1.06)         | 0.97 (0.88, 1.07)         | 0.98 (0.90, 1.07)         |

\*Bolded and italicized values are statistically significant at the  $\alpha = 0.05$ .

SUPPLEMENTAL TABLE 5B

Less than 40 L—this table includes all of the covariates in the Table 5 models concerning the association between positive containers  $>$  40 L in neighboring households and the odds of a target container being positive for *Aedes aegypti* pupae\*

| Covariate                                  | 0–10 m                   | 10–20 m                   | 20–30 m                   |
|--------------------------------------------|--------------------------|---------------------------|---------------------------|
| Pos. neighbor container in radius interval | <b>2.16 (1.01, 4.63)</b> | 1.70 (0.90, 3.23)         | 0.89 (0.14, 5.65)         |
| Temephos                                   | 0.18 (0.01, 2.26)        | 0.18 (0.01, 2.40)         | 0.16 (0.01, 2.21)         |
| Chlorine                                   | 2.68 (0.85, 8.45)        | 2.76 (0.87, 8.73)         | 2.98 (0.94, 9.40)         |
| Container topped/capped                    | 0.52 (0.15, 1.81)        | 0.47 (0.13, 1.71)         | 0.55 (0.15, 1.93)         |
| No. of persons living in the house         | 0.90 (0.72, 1.11)        | 0.89 (0.72, 1.12)         | 0.90 (0.72, 1.12)         |
| Container rainwater-fed                    | 1.20 (0.32, 4.48)        | 1.15 (0.30, 4.40)         | 1.28 (0.34, 4.84)         |
| Container indoors                          | 0.87 (0.27, 2.79)        | 0.86 (0.26, 2.82)         | 0.92 (0.29, 2.98)         |
| Container $\geq$ 40 L                      | <b>5.83 (2.03, 16.7)</b> | <b>5.47 (1.88, 15.92)</b> | <b>5.76 (1.96, 16.88)</b> |
| No. of containers in household             | 0.98 (0.90, 1.07)        | 0.98 (0.89, 1.07)         | 0.97 (0.89, 1.07)         |

\*Bolded and italicized values are statistically significant at the  $\alpha = 0.05$ .
